# Supplementary material for: Gene expression and phytohormone levels in the asymptomatic and symptomatic phases of infection in potato tubers inoculated with Dickeya solani
Source: PLoS One. 2022 Aug 29;17(8):e0273481. doi: 10.1371/journal.pone.0273481 (PMC9423618; doi:10.1371/journal.pone.0273481)
Supplement: S5 Table — (XLSX) [file pone.0273481.s006.xlsx]

## Sheet: Sheet2
Treatments/ Genes	Biological Replica	Technical. R 1	Technical. R 2	Technical. R 3	Target Max	Target Min	Ave each replica	Cp Target average	SD of Cp	Tech. R 1	Tech. R 2	Tech. R 3	Ref Max	Ref Min	Ave each replica	Cp Ref-average	SD of reference Cp	ΔCP Gene-Ref-each Rep	ΔCP Gene-Reference	ΔCP St dev	Ave-ΔCP St dev	T-Test (Tail 1-Type 2)	ΔΔCP	2^(-ΔΔCP) a.k.a F.C	Min 2^(-ΔΔCP)	Max 2^(-ΔΔCp)	2^(-ΔΔCp)- Min 2^(-ΔΔCp)	Max 2^(-ΔΔCP)- 2^(-ΔΔCP)
Control 1hpi
	Biological .R 1	22.62	22.27	23.03	23.03	22.27	22.64		0.380395	30.25	22.51	23.37	30.25	22.51	25.3767		4.24228	-2.73667		4.2593
	Biological .R 2	22.61	22.43	21.95	22.61	21.95	22.33		0.341174	27.38	21.52	19.04	27.38	19.04	22.6467		4.28263	-0.316667		4.2962
PYL 4	Biological .R 3	21.88	21.95	22.2	22.2	21.88	22.01	22.3267	0.168226	26.49	19.79	20.25	26.49	19.79	22.1767	23.4	3.74253	-0.166667	-1.07333	3.74631	4.1006		0	1	0.0582902	17.1555	0.94171	16.1555
	Biological .R 1	31.67	30.11	31.54	31.67	30.11	31.1067		0.865583	30.25	22.51	23.37	30.25	22.51	25.3767		4.24228	5.73		4.32968
	Biological .R 2	31.65	31.11	33.63	33.63	31.11	32.13		1.3268	27.38	21.52	19.04	27.38	19.04	22.6467		4.28263	9.48333		4.48345
KPI	Biological .R 3	30.87	32.74	30.27	32.74	30.27	31.2933	31.51	1.28827	26.49	19.79	20.25	26.49	19.79	22.1767	23.4	3.74253	9.11667	8.11	3.95805	4.25706		0	1	0.0522994	19.1207	0.947701	18.1207
	Biological .R 1	37.23	38.74	37.11	38.74	37.11	37.6933		0.908424	30.25	22.51	23.37	30.25	22.51	25.3767		4.24228	12.3167		4.33845
	Biological .R 2	37.54	36.68	37.71	37.71	36.68	37.31		0.552178	27.38	21.52	19.04	27.38	19.04	22.6467		4.28263	14.6633		4.31808
WRKY70	Biological .R 3	37.53	37.34	38.05	38.05	37.34	37.64	37.5478	0.36756	26.49	19.79	20.25	26.49	19.79	22.1767	23.4	3.74253	15.4633	14.1478	3.76054	4.13902		0	1	0.0567584	17.6186	0.943242	16.6186
	Biological .R 1	32.11	33.44	32.21	33.44	32.11	32.5867		0.740698	30.25	22.51	23.37	30.25	22.51	25.3767		4.24228	7.21		4.30646
	Biological .R 2	32.62	34.39	34.41	34.41	32.62	33.8067		1.02773	27.38	21.52	19.04	27.38	19.04	22.6467		4.28263	11.16		4.40422
GLUB	Biological .R 3	34.44	34.11	35.21	35.21	34.11	34.5867	33.66	0.564476	26.49	19.79	20.25	26.49	19.79	22.1767	23.4	3.74253	12.41	10.26	3.78486	4.16518		0	1	0.0557386	17.9409	0.944261	16.9409
	Biological .R 1	33.87	33	31.04	33.87	31.04	32.6367		1.44956	30.25	22.51	23.37	30.25	22.51	25.3767		4.24228	7.26		4.4831
	Biological .R 2	32.29	32.58	33.11	33.11	32.29	32.66		0.415812	27.38	21.52	19.04	27.38	19.04	22.6467		4.28263	10.0133		4.30277
MAPKKK	Biological .R 3	34.61	32.48	34.87	34.87	32.48	33.9867	33.0944	1.31127	26.49	19.79	20.25	26.49	19.79	22.1767	23.4	3.74253	11.81	9.69444	3.9656	4.25049		0	1	0.0525382	19.0338	0.947462	18.0338
	Biological .R 1	35.59	37.41	37.04	37.41	35.59	36.68		0.961925	30.25	22.51	23.37	30.25	22.51	25.3767		4.24228	11.3033		4.34997
	Biological .R 2	35.72	33.35	35.85	35.85	33.35	34.9733		1.40735	27.38	21.52	19.04	27.38	19.04	22.6467		4.28263	12.3267		4.50794
GST	Biological .R 3	35.56	36.65	35.97	36.65	35.56	36.06	35.9044	0.550545	26.49	19.79	20.25	26.49	19.79	22.1767	23.4	3.74253	13.8833	12.5044	3.78281	4.21357		0	1	0.0538999	13.7638	0.9461	12.7638
	Biological .R 1	26.75	25.87	24.07	26.75	24.07	25.5633		1.36606	30.25	22.51	23.37	30.25	22.51	25.3767		4.24228	0.186667		4.4568
	Biological .R 2	25.08	24.28	24.35	25.08	24.28	24.57		0.443058	27.38	21.52	19.04	27.38	19.04	22.6467		4.28263	1.92333		4.30549
SCL28	Biological .R 3	26.43	24.62	25.75	26.43	24.62	25.6	25.2444	0.914276	26.49	19.79	20.25	26.49	19.79	22.1767	23.4	3.74253	3.42333	1.84444	3.85259	4.20496		0	1	0.0542227	14.4459	0.945777	13.4459
	Biological .R 1	34.84	34.57	34.19	34.84	34.19	34.5333		0.326548	30.25	22.51	23.37	30.25	22.51	25.3767		4.24228	9.15667		4.25483
	Biological .R 2	34.8	35.55	34.62	35.55	34.62	34.99		0.493254	27.38	21.52	19.04	27.38	19.04	22.6467		4.28263	12.3433		4.31094
JAZ1	Biological .R 3	35.62	36.66	35.85	36.66	35.62	36.0433	35.1889	0.546291	26.49	19.79	20.25	26.49	19.79	22.1767	23.4	3.74253	13.8667	11.7889	3.78219	4.11599		0	1	0.0576719	13.7579	0.942328	12.7579
	Biological .R 1	34.75	34.33	34.46	34.75	34.33	34.5133		0.215019	20.33	21.32	19.6248	21.32	19.6248	20.4249		0.851578	14.0884		0.878304
	Biological .R 2	33.62	35.84	35.31	35.84	33.62	34.9233		1.15941	19.81	20.77	20.14	20.77	19.81	20.24		0.48775	14.6833		1.25783
RBOHB	Biological .R 3	34.37	33.16	34.43	34.43	33.16	33.9867	34.4744	0.716543	20.35	20.62	20.25	20.62	20.25	20.4067	20.3572	0.191398	13.58	14.1172	0.741665	0.959266		0	1	0.514319	1.6721	0.485681	0.672104
DS 1hpi
	Biological .R 1	28.74	29.19	32.12	32.12	28.74	30.0167		1.83538	33.74	26.62	24.58	33.74	24.58	28.3133		4.80905	1.70333		5.14738
	Biological .R 2	30.35	30.07	29.49	30.35	29.49	29.97		0.438634	30.17	23.36	22.77	30.17	22.77	25.4333		4.11267	4.53667		4.13599
PYL 4	Biological .R 3	28.55	23.61	27.29	28.55	23.61	26.4833	28.8233	2.56689	26.33	21.18	22.05	26.33	21.18	23.1867	25.6444	2.75674	3.29667	3.17889	3.76677	4.35005	0.00463094	-4.25222	0.0524751	0.00257311	1.07016	0.049902	1.01769
	Biological .R 1	28.32	29.77	36.13	36.13	28.32	31.4067		4.15428	33.74	26.62	24.58	33.74	24.58	28.3133		4.80905	3.09333		6.35492
	Biological .R 2	24.11	19.33	22.95	24.11	19.33	22.13		2.49327	30.17	23.36	22.77	30.17	22.77	25.4333		4.11267	-3.30333		4.80941
KPI	Biological .R 3	19.48	19.65	19.27	19.65	19.27	19.4667	24.3344	0.190351	26.33	21.18	22.05	26.33	21.18	23.1867	25.6444	2.75674	-3.72	-1.31	2.76331	4.64254	0.0544366	9.42	685.019	27.4257	17109.9	657.593	16424.9
	Biological .R 1	21.73	20.81	21.11	21.73	20.81	21.2167		0.469184	33.74	26.62	24.58	33.74	24.58	28.3133		4.80905	-7.09667		4.83188
	Biological .R 2	21.62	21.32	22.06	22.06	21.32	21.6667		0.372201	30.17	23.36	22.77	30.17	22.77	25.4333		4.11267	-3.76667		4.12948
WRKY70	Biological .R 3	22.58	23.65	23.37	23.65	22.58	23.2	22.0278	0.554887	26.33	21.18	22.05	26.33	21.18	23.1867	25.6444	2.75674	0.0133333	-3.61667	2.81203	3.92446	0.00223438	17.7644	222654	14663.9	3.38074e+06	207990	3.15809e+06
	Biological .R 1	22.25	22.51	37.37	37.37	22.25	27.3767		8.65546	33.74	26.62	24.58	33.74	24.58	28.3133		4.80905	-0.936667		9.90171
	Biological .R 2	19.38	21.52	19.04	21.52	19.04	19.98		1.34447	30.17	23.36	22.77	30.17	22.77	25.4333		4.11267	-5.45333		4.32685
GLUB	Biological .R 3	19.49	21.01	19.25	21.01	19.25	19.9167	22.4244	0.954428	26.33	21.18	22.05	26.33	21.18	23.1867	25.6444	2.75674	-3.27	-3.22	2.91729	5.71528	0.018667	13.48	11425.7	217.477	600283	11208.3	588857
	Biological .R 1	19.25	20.51	23.37	23.37	19.25	21.0433		2.11115	33.74	26.62	24.58	33.74	24.58	28.3133		4.80905	-7.27		5.25203
	Biological .R 2	19.51	24.32	19.04	24.32	19.04	20.9567		2.9222	30.17	23.36	22.77	30.17	22.77	25.4333		4.11267	-4.47667		5.04512
MAPKKK	Biological .R 3	34.09	30.79	23.25	34.09	23.25	29.3767	23.7922	5.55649	26.33	21.18	22.05	26.33	21.18	23.1867	25.6444	2.75674	6.19	-1.85222	6.20275	5.49997	0.0299992	11.5467	2991.53	66.1054	135378	2925.42	132387
	Biological .R 1	20.27	20.24	18.95	20.27	18.95	19.82		0.753591	33.74	26.62	24.58	33.74	24.58	28.3133		4.80905	-8.49333		4.86773
	Biological .R 2	21.26	18.94	19.78	21.26	18.94	19.9933		1.17462	30.17	23.36	22.77	30.17	22.77	25.4333		4.11267	-5.44		4.27712
GST	Biological .R 3	20.24	20.66	19.01	20.66	19.01	19.97	19.9278	0.857496	26.33	21.18	22.05	26.33	21.18	23.1867	25.6444	2.75674	-3.21667	-5.71667	2.88703	4.01063	0.000987449	18.2211	305563	18957.5	4.92516e+06	286606	4.6196e+06
	Biological .R 1	25.74	35.25	29.51	35.25	25.74	30.1667		4.78889	33.74	26.62	24.58	33.74	24.58	28.3133		4.80905	1.85333		6.78678
	Biological .R 2	35.65	37.09	39.42	39.42	35.65	37.3867		1.90243	30.17	23.36	22.77	30.17	22.77	25.4333		4.11267	11.9533		4.53136
SCL28	Biological .R 3	39.44	39.65	37.19	39.65	37.19	38.76	35.4378	1.36371	26.33	21.18	22.05	26.33	21.18	23.1867	25.6444	2.75674	15.5733	9.79333	3.0756	4.79792	0.0654906	-7.94889	0.00404712	0.000145489	0.11258	0.00390163	0.108533
	Biological .R 1	27.57	27.38	38.11	38.11	27.38	31.02		6.14085	33.74	26.62	24.58	33.74	24.58	28.3133		4.80905	2.70667		7.79981
	Biological .R 2	21.48	27.28	21.65	27.28	21.48	23.47		3.30065	30.17	23.36	22.77	30.17	22.77	25.4333		4.11267	-1.96333		5.27336
JAZ1	Biological .R 3	27.14	27.36	28.21	28.21	27.14	27.57	27.3533	0.565066	26.33	21.18	22.05	26.33	21.18	23.1867	25.6444	2.75674	4.38333	1.70889	2.81406	5.29574	0.0239183	10.08	1082.39	27.5553	42516.7	1054.83	41434.4
	Biological .R 1	24.26	24.29	23.38	24.29	23.38	23.9767		0.516946	34.25	35.51	36.37	36.37	34.25	35.3767		1.06627	-11.4		1.18498
	Biological .R 2	23.38	24.52	23.34	24.52	23.34	23.7467		0.670025	36.28	35.52	36.04	36.28	35.52	35.9467		0.388501	-12.2		0.774511
RBOHB	Biological .R 3	24.49	25.12	26.25	26.25	24.49	25.2867	24.3367	0.891759	35.49	34.53	36.25	36.25	34.53	35.4233	35.5822	0.861936	-10.1367	-11.2456	1.24023	1.06657	0.00065132	25.3628	4.31483e+07	2.06012e+07	9.03719e+07	2.2547e+07	4.72236e+07
Control 24hpi
	Biological .R 1	24.63	24.87	26.64	26.64	24.63	25.38		1.09777	35.32	27.44	28.44	35.32	27.44	30.4		4.29008	-5.02		4.42831
	Biological .R 2	27.08	26.48	25.55	27.08	25.55	26.37		0.770909	28.07	23.43	22.19	28.07	22.19	24.5633		3.09951	1.80667		3.19394
SCL28	Biological .R 3	26.33	24.92	26.15	26.33	24.92	25.8	25.85	0.767398	30.61	20.39	21.45	30.61	20.39	24.15	26.3711	5.61957	1.65	-0.521111	5.67173	4.43132		0	1	0.0463488	21.5755	0.953651	20.5755
	Biological .R 1	32.11	34.65	33.47	34.65	32.11	33.41		1.27106	20.33	21.41	19.3248	21.41	19.3248	20.3549		1.04282	13.0551		1.6441
	Biological .R 2	32.18	30.77	32.89	32.89	30.77	31.9467		1.07909	19.81	20.77	20.14	20.77	19.81	20.24		0.48775	11.7067		1.1842
PR1	Biological .R 3	32.36	33.13	33.27	33.27	32.36	32.92	32.7589	0.49	20.35	20.62	20.25	20.62	20.25	20.4067	20.3339	0.191398	12.5133	12.425	0.526054	1.11812		0	1	0.460694	2.17064	0.539306	1.17064
	Biological .R 1	28.91	28.01	33.88	33.88	28.01	30.2667		3.16143	35.32	27.44	28.44	35.32	27.44	30.4		4.29008	-0.133333		5.32911
	Biological .R 2	39.82	39.64	39.71	39.82	39.64	39.7233		0.0907377	28.07	23.43	22.19	28.07	22.19	24.5633		3.09951	15.16		3.10083
JAZ1	Biological .R 3	39.15	39.84	39.03	39.84	39.03	39.34	36.4433	0.43715	30.61	20.39	21.45	30.61	20.39	24.15	26.3711	5.61957	15.19	10.0722	5.63655	4.68883		0	1	0.0387722	25.7916	0.961228	24.7916
	Biological .R 1	20.98	22.31	22.62	22.62	20.98	21.97		0.871263	35.32	27.44	28.44	35.32	27.44	30.4		4.29008	-8.43		4.37766
	Biological .R 2	20.48	21.42	19.37	21.42	19.37	20.4233		1.02617	28.07	23.43	22.19	28.07	22.19	24.5633		3.09951	-4.14		3.26496
COI1	Biological .R 3	18.21	19.17	19.39	19.39	18.21	18.9233	20.4389	0.627482	30.61	20.39	21.45	30.61	20.39	24.15	26.3711	5.61957	-5.22667	-5.93222	5.6545	4.43237		0	1	0.0463151	21.5912	0.953685	20.5912
	Biological .R 1	32.87	33.69	30.12	33.69	30.12	32.2267		1.86993	35.32	27.44	28.44	35.32	27.44	30.4		4.29008	1.82667		4.6799
	Biological .R 2	28.65	28.87	30.09	30.09	28.65	29.2033		0.775715	28.07	23.43	22.19	28.07	22.19	24.5633		3.09951	4.64		3.1951
PAL1	Biological .R 3	30.75	29.61	30.29	30.75	29.61	30.2167	30.5489	0.573527	30.61	20.39	21.45	30.61	20.39	24.15	26.3711	5.61957	6.06667	4.17778	5.64876	4.50792		0	1	0.0439522	22.752	0.956048	21.752
	Biological .R 1	35.59	36.41	37.04	37.04	35.59	36.3467		0.727072	35.32	27.44	28.44	35.32	27.44	30.4		4.29008	5.94667		4.35126
	Biological .R 2	35.72	37.25	36.95	37.25	35.72	36.64		0.81074	28.07	23.43	22.19	28.07	22.19	24.5633		3.09951	12.0767		3.20378
NPR3	Biological .R 3	35.56	36.65	34.97	36.65	34.97	35.7267	36.2378	0.852311	30.61	20.39	21.45	30.61	20.39	24.15	26.3711	5.61957	11.5767	9.86667	5.68384	4.41296		0	1	0.0469425	21.3026	0.953057	20.3026
	Biological .R 1	28.07	27.38	26.11	28.07	26.11	27.1867		0.9942	35.32	27.44	28.44	35.32	27.44	30.4		4.29008	-3.21333		4.40377
	Biological .R 2	28.22	25.3	28.11	28.22	25.3	27.21		1.65502	28.07	23.43	22.19	28.07	22.19	24.5633		3.09951	2.64667		3.51369
PYL4	Biological .R 3	26.44	24.56	25.61	26.44	24.56	25.5367	26.6444	0.942143	30.61	20.39	21.45	30.61	20.39	24.15	26.3711	5.61957	1.38667	0.273333	5.698	4.53849		0	1	0.0430307	23.2392	0.956969	22.2392
	Biological .R 1	37.71	36.01	37.88	37.88	36.01	37.2		1.03407	35.32	27.44	28.44	35.32	27.44	30.4		4.29008	6.8		4.41295
	Biological .R 2	36.22	35.64	35.71	36.22	35.64	35.8567		0.316596	28.07	23.43	22.19	28.07	22.19	24.5633		3.09951	11.2933		3.11563
KPI	Biological .R 3	37.15	35.84	37.03	37.15	35.84	36.6733	36.5767	0.724178	30.61	20.39	21.45	30.61	20.39	24.15	26.3711	5.61957	12.5233	10.2056	5.66604	4.39821		0	1	0.047425	21.0859	0.952575	20.0859
	Biological .R 1	33.52	38.24	38.04	38.24	33.52	36.6		2.66923	35.32	27.44	28.44	35.32	27.44	30.4		4.29008	6.2		5.05268
	Biological .R 2	31.67	35.94	30.54	35.94	30.54	32.7167		2.84809	28.07	23.43	22.19	28.07	22.19	24.5633		3.09951	8.15333		4.20934
GLUB	Biological .R 3	26	25.66	26.35	26.35	25.66	26.0033	31.7733	0.345012	30.61	20.39	21.45	30.61	20.39	24.15	26.3711	5.61957	1.85333	5.40222	5.63015	4.96406		0	1	0.0320383	31.2127	0.967962	30.2127
	Biological .R 1	32.11	34.55	33.47	34.55	32.11	33.3767		1.22267	20.33	21.41	19.3248	21.41	19.3248	20.3549		1.04282	13.0217		1.60699
	Biological .R 2	33.18	35.09	34.39	35.09	33.18	34.22		0.966282	19.81	20.77	20.14	20.77	19.81	20.24		0.48775	13.98		1.0824
MAPKKK	Biological .R 3	35.36	35.31	36.25	36.25	35.31	35.64	34.4122	0.528867	20.35	20.62	20.25	20.62	20.25	20.4067	20.3339	0.191398	15.2333	14.0784	0.562435	1.08394		0	1	0.471738	2.11982	0.528262	1.11982
	Biological .R 1	32.47	28.93	26.18	32.47	26.18	29.1933		3.15326	35.32	27.44	28.44	35.32	27.44	30.4		4.29008	-1.20667		5.32427
	Biological .R 2	34.11	32.24	33.87	34.11	32.24	33.4067		1.01746	28.07	23.43	22.19	28.07	22.19	24.5633		3.09951	8.84333		3.26223
GST	Biological .R 3	33.41	38.78	37.96	38.78	33.41	36.7167	33.1056	2.89286	30.61	20.39	21.45	30.61	20.39	24.15	26.3711	5.61957	12.5667	6.73444	6.32046	4.96899		0	1	0.031929	31.3195	0.968071	30.3195
DS 24hpi
	Biological .R 1	34.72	35.21	32.29	35.21	32.29	34.0733		1.56372	36.25	32.54	30.86	36.25	30.86	33.2167		2.75798	0.856667		3.17044
	Biological .R 2	33.18	33.67	35.27	35.27	33.18	34.04		1.09302	32.19	26.67	25.48	32.19	25.48	28.1133		3.58028	5.92667		3.74341
SCL28	Biological .R 3	35.45	34.71	34.37	35.45	34.37	34.8433	34.3189	0.552208	32.19	24.67	25.48	32.19	24.67	27.4467	29.5922	4.12776	7.39667	4.72667	4.16454	3.6928	0.00569967	-5.24778	0.0263185	0.00203526	0.340333	0.0242833	0.314014
	Biological .R 1	21.21	21.14	22.27	22.27	21.14	21.54		0.633167	34.25	35.51	36.37	36.37	34.25	35.3767		1.06627	-13.8367		1.24009
	Biological .R 2	22.17	22.25	23.32	23.32	22.17	22.58		0.642106	36.28	35.52	36.04	36.28	35.52	35.9467		0.388501	-13.3667		0.750489
PR1	Biological .R 3	19.66	21.95	19.74	21.95	19.66	20.45	21.5233	1.29965	35.49	34.53	36.25	36.25	34.53	35.4233	35.5822	0.861936	-14.9733	-14.0589	1.5595	1.18336	0.000375204	26.4839	9.38538e+07	4.13261e+07	2.13147e+08	5.25276e+07	1.19293e+08
	Biological .R 1	19.41	19.66	19.59	19.66	19.41	19.5533		0.12897	36.25	32.54	30.86	36.25	30.86	33.2167		2.75798	-13.6633		2.76099
	Biological .R 2	32.88	19.58	19.33	32.88	19.33	23.93		7.75194	32.19	26.67	25.48	32.19	25.48	28.1133		3.58028	-4.18333		8.53879
JAZ1	Biological .R 3	20.81	19.7	19.39	20.81	19.39	19.9667	21.15	0.746615	32.19	24.67	25.48	32.19	24.67	27.4467	29.5922	4.12776	-7.48	-8.44222	4.19474	5.16484	0.0100911	18.5144	374458	10438.3	1.34331e+07	364020	1.30586e+07
	Biological .R 1	27.23	29.54	29.01	29.54	27.23	28.5933		1.21006	36.25	32.54	30.86	36.25	30.86	33.2167		2.75798	-4.62333		3.01175
	Biological .R 2	29.88	28.73	29.65	29.88	28.73	29.42		0.608523	32.19	26.67	25.48	32.19	25.48	28.1133		3.58028	1.30667		3.63163
COI1	Biological .R 3	30.06	28.33	30.74	30.74	28.33	29.71	29.2411	1.24254	32.19	24.67	25.48	32.19	24.67	27.4467	29.5922	4.12776	2.26333	-0.351111	4.31072	3.65137	0.0172815	-5.58111	0.020889	0.00166244	0.262476	0.0192266	0.241587
	Biological .R 1	20.31	19.81	20.31	20.31	19.81	20.1433		0.288675	36.25	32.54	30.86	36.25	30.86	33.2167		2.75798	-13.0733		2.77304
	Biological .R 2	19.62	21.35	21.06	21.35	19.62	20.6767		0.926517	32.19	26.67	25.48	32.19	25.48	28.1133		3.58028	-7.43667		3.69822
PAL1	Biological .R 3	22.58	23.11	30.87	30.87	22.58	25.52	22.1133	4.64081	32.19	24.67	25.48	32.19	24.67	27.4467	29.5922	4.12776	-1.92667	-7.47889	6.21092	4.2274	0.0141645	11.6567	3228.54	172.359	60475.5	3056.18	57246.9
	Biological .R 1	19.98	21.67	20.62	21.67	19.98	20.7567		0.853249	36.25	32.54	30.86	36.25	30.86	33.2167		2.75798	-12.46		2.88695
	Biological .R 2	20.48	19.68	19.37	20.48	19.37	19.8433		0.572742	32.19	26.67	25.48	32.19	25.48	28.1133		3.58028	-8.27		3.62581
NPR3	Biological .R 3	35.21	30.67	38.29	38.29	30.67	34.7233	25.1078	3.83324	32.19	24.67	25.48	32.19	24.67	27.4467	29.5922	4.12776	7.27667	-4.48444	5.63313	4.04863	0.052483	14.3511	20898.5	1262.86	345839	19635.6	324940
	Biological .R 1	32.32	34.28	35.3	35.3	32.32	33.9667		1.51451	36.25	32.54	30.86	36.25	30.86	33.2167		2.75798	0.75		3.14645
	Biological .R 2	35.15	34.24	34.61	35.15	34.24	34.6667		0.457639	32.19	26.67	25.48	32.19	25.48	28.1133		3.58028	6.55333		3.60941
PYL4	Biological .R 3	33.69	35.92	33.04	35.92	33.04	34.2167	34.2833	1.51051	32.19	24.67	25.48	32.19	24.67	27.4467	29.5922	4.12776	6.77	4.69111	4.39546	3.71711	0.00587287	-4.41778	0.046786	0.00355758	0.615287	0.0432285	0.568501
	Biological .R 1	19.31	19.35	19.64	19.64	19.31	19.4333		0.180093	36.25	32.54	30.86	36.25	30.86	33.2167		2.75798	-13.7833		2.76385
	Biological .R 2	19.13	19.05	19.07	19.13	19.05	19.0833		0.0416333	32.19	26.67	25.48	32.19	25.48	28.1133		3.58028	-9.03		3.58053
KPI	Biological .R 3	35.83	34.02	36.99	36.99	34.02	35.6133	24.71	1.49681	32.19	24.67	25.48	32.19	24.67	27.4467	29.5922	4.12776	8.16667	-4.88222	4.39077	3.57838	0.0533193	15.0878	34823.6	2915.23	415982	31908.4	381158
	Biological .R 1	21.74	19.08	20.56	21.74	19.08	20.46		1.33282	36.25	32.54	30.86	36.25	30.86	33.2167		2.75798	-12.7567		3.06314
	Biological .R 2	19.53	19.87	20.48	20.48	19.53	19.96		0.481352	32.19	26.67	25.48	32.19	25.48	28.1133		3.58028	-8.15333		3.6125
GLUB	Biological .R 3	30.34	21.15	30.99	30.99	21.15	27.4933	22.6378	5.50309	32.19	24.67	25.48	32.19	24.67	27.4467	29.5922	4.12776	0.0466667	-6.95444	6.87913	4.51826	0.0731551	12.3567	5244.78	228.874	120187	5015.91	114942
	Biological .R 1	22.84	23.14	22.27	23.14	22.27	22.75		0.441928	34.25	35.51	36.37	36.37	34.25	35.3767		1.06627	-12.6267		1.15422
	Biological .R 2	22.68	22.525	23.32	23.32	22.525	22.8417		0.421436	36.28	35.52	36.04	36.28	35.52	35.9467		0.388501	-13.105		0.573186
MAPKKK	Biological .R 3	24.36	23.95	25.06	25.06	23.95	24.4567	23.3494	0.561278	35.49	34.53	36.25	36.25	34.53	35.4233	35.5822	0.861936	-10.9667	-12.2328	1.02858	0.918662	0.000126399	26.3111	8.32608e+07	4.40449e+07	1.57393e+08	3.92159e+07	7.41321e+07
	Biological .R 1	21.74	22.38	29.56	29.56	21.74	24.56		4.34194	36.25	32.54	30.86	36.25	30.86	33.2167		2.75798	-8.65667		5.14382
	Biological .R 2	22.43	24.77	23.48	24.77	22.43	23.56		1.17205	32.19	26.67	25.48	32.19	25.48	28.1133		3.58028	-4.55333		3.76724
GST	Biological .R 3	20.34	21.15	20.99	21.15	20.34	20.8267	22.9822	0.428991	32.19	24.67	25.48	32.19	24.67	27.4467	29.5922	4.12776	-6.62	-6.61	4.15	4.35369	0.0294173	13.3444	10401.1	508.731	212651	9892.34	202250
Control-168hpi
	Biological .R 1	26.07	27.38	26.11	27.38	26.07	26.52		0.74505	28.25	20.74	23.86	28.25	20.74	24.2833		3.77285	2.23667		3.84572
	Biological .R 2	24.22	27.96	28.11	28.11	24.22	26.7633		2.20387	27.69	21.79	22.9	27.69	21.79	24.1267		3.13545	2.63667		3.8325
LOX3	Biological .R 3	28.44	24.56	24.61	28.44	24.56	25.87	26.3844	2.22583	27.51	23.84	22.55	27.51	22.55	24.6333	24.3478	2.57341	1.23667	2.03667	3.40246	3.69356		0	1	0.0772908	12.9381	0.922709	11.9381
	Biological .R 1	34.77	34.58	36.95	36.95	34.58	35.4333		1.3169	28.25	20.74	23.86	28.25	20.74	24.2833		3.77285	11.15		3.99608
	Biological .R 2	35.52	33.24	36.14	36.14	33.24	34.9667		1.52713	27.69	21.79	22.9	27.69	21.79	24.1267		3.13545	10.84		3.48757
MYC2	Biological .R 3	33.49	32.61	34.09	34.09	32.61	33.3967	34.5989	0.744401	27.51	23.84	22.55	27.51	22.55	24.6333	24.3478	2.57341	8.76333	10.2511	2.67891	3.38752		0	1	0.0955552	10.4652	0.904445	9.46516
	Biological .R 1	32.47	34.93	35.18	35.18	32.47	34.1933		1.49768	28.25	20.74	23.86	28.25	20.74	24.2833		3.77285	9.91		4.05924
	Biological .R 2	36.61	36.84	34.87	36.84	34.87	36.1067		1.07714	27.69	21.79	22.9	27.69	21.79	24.1267		3.13545	11.98		3.31531
DEF	Biological .R 3	35.41	32.78	33.96	35.41	32.78	34.05	34.7833	1.31731	27.51	23.84	22.55	27.51	22.55	24.6333	24.3478	2.57341	9.41667	10.4356	2.89097	3.42184		0	1	0.0933088	10.7171	0.906691	9.7171
	Biological .R 1	35.11	37.49	36.47	37.49	35.11	36.3567		1.19404	20.33	21.41	19.3248	21.41	19.3248	20.3549		1.04282	16.0017		1.58531
	Biological .R 2	38.18	39.09	38.39	39.09	38.18	38.5533		0.47648	19.81	20.77	20.14	20.77	19.81	20.24		0.48775	18.3133		0.68186
ABAH1	Biological .R 3	36.09	37.18	36.35	37.18	36.09	36.54	37.15	0.569298	20.35	20.62	20.25	20.62	20.25	20.4067	20.3339	0.191398	16.1333	16.8161	0.600611	0.955928		0	1	0.51551	1.93983	0.48449	0.939827
	Biological .R 1	36.77	36.74	37.11	37.11	36.74	36.8733		0.205508	28.25	20.74	23.86	28.25	20.74	24.2833		3.77285	12.59		3.77845
	Biological .R 2	38.54	36.64	38.77	38.77	36.64	37.9833		1.16903	27.69	21.79	22.9	27.69	21.79	24.1267		3.13545	13.8567		3.34629
SCL21	Biological .R 3	37.23	37.34	35.05	37.34	35.05	36.54	37.1322	1.29155	27.51	23.84	22.55	27.51	22.55	24.6333	24.3478	2.57341	11.9067	12.7844	2.87933	3.33469		0	1	0.0991194	10.0888	0.900881	9.08885
	Biological .R 1	32.61	30.49	32.47	32.61	30.49	31.8567		1.18564	20.33	21.41	19.3248	21.41	19.3248	20.3549		1.04282	11.5017		1.57899
	Biological .R 2	33.38	35.31	34.32	35.31	33.38	34.3367		0.965108	19.81	20.77	20.14	20.77	19.81	20.24		0.48775	14.0967		1.08136
PE2	Biological .R 3	30.65	31.23	32.45	32.45	30.65	31.4433	32.5456	0.918767	20.35	20.62	20.25	20.62	20.25	20.4067	20.3339	0.191398	11.0367	12.2117	0.938492	1.19961		0.572756	1.48736	0.647585	3.41614	0.839776	1.92878
	Biological .R 1	32.64	31.89	33.47	33.47	31.89	32.6667		0.790337	20.33	21.41	19.3248	21.41	19.3248	20.3549		1.04282	12.3117		1.30848
	Biological .R 2	32.38	31.91	31.32	32.38	31.32	31.87		0.531131	19.81	20.77	20.14	20.77	19.81	20.24		0.48775	11.63		0.72111
AMY	Biological .R 3	33.25	34.09	32.45	34.09	32.45	33.2633	32.6	0.820081	20.35	20.62	20.25	20.62	20.25	20.4067	20.3339	0.191398	12.8567	12.2661	0.84212	0.957236		0.518311	1.43228	0.737684	2.78089	0.694594	1.34861
	Biological .R 1	37.22	38.58	38.91	38.91	37.22	38.2367		0.895786	28.25	20.74	23.86	28.25	20.74	24.2833		3.77285	13.9533		3.87774
	Biological .R 2	31.24	30.65	31.37	31.37	30.65	31.0867		0.38371	27.69	21.79	22.9	27.69	21.79	24.1267		3.13545	6.96		3.15884
STP13	Biological .R 3	36.67	35.69	37.07	37.07	35.69	36.4767	35.2667	0.710023	27.51	23.84	22.55	27.51	22.55	24.6333	24.3478	2.57341	11.8433	10.9189	2.66956	3.23538		1.86556	3.64408	0.386938	34.319	3.25714	30.6749
	Biological .R 1	35.61	37.49	37.47	37.49	35.61	36.8567		1.07969	20.33	21.41	19.3248	21.41	19.3248	20.3549		1.04282	16.5017		1.50107
	Biological .R 2	33.98	35.25	33.89	35.25	33.89	34.3733		0.760548	19.81	20.77	20.14	20.77	19.81	20.24		0.48775	14.1333		0.903512
SWEET	Biological .R 3	35.09	35.08	36.15	36.15	35.08	35.44	35.5567	0.614898	20.35	20.62	20.25	20.62	20.25	20.4067	20.3339	0.191398	15.0333	15.2228	0.643998	1.01619		-2.43836	0.184494	0.0912173	0.373153	0.0932766	0.188659
	Biological .R 1	36.07	36	35.74	36.07	35.74	35.9367		0.173877	28.25	20.74	23.86	28.25	20.74	24.2833		3.77285	11.6533		3.77686
	Biological .R 2	34.96	36.11	36.44	36.44	34.96	35.8367		0.776938	27.69	21.79	22.9	27.69	21.79	24.1267		3.13545	11.71		3.23027
PATATIN	Biological .R 3	33.9	35.26	34.71	35.26	33.9	34.6233	35.4656	0.68413	27.51	23.84	22.55	27.51	22.55	24.6333	24.3478	2.57341	9.99	11.1178	2.66279	3.22331		1.66667	3.1748	0.339941	29.6503	2.83486	26.4755
DS-168 hpi
	Biological .R 1	35.66	36.09	36.21	36.21	35.66	35.9867		0.289194	36.25	26.54	28.86	36.25	26.54	30.55		5.07081	5.43667		5.07905
	Biological .R 2	35.77	34.98	34.86	35.77	34.86	35.2033		0.494402	32.19	26.91	24.23	32.19	24.23	27.7767		4.05015	7.42667		4.08022
LOX3	Biological .R 3	33.76	34.52	35.79	35.79	33.76	34.69	35.2933	1.02562	32.11	24.61	25.48	32.11	24.61	27.4	28.5756	4.10211	7.29	6.71778	4.22838	4.46255	0.00180599	-4.68111	0.0389803	0.00176801	0.859421	0.0372123	0.820441
	Biological .R 1	28.81	28.69	29.13	29.13	28.69	28.8767		0.22745	36.25	26.54	28.86	36.25	26.54	30.55		5.07081	-1.67333		5.07591
	Biological .R 2	29.23	29.87	31.7	31.7	29.23	30.2667		1.28189	32.19	26.91	24.23	32.19	24.23	27.7767		4.05015	2.49		4.24817
MYC2	Biological .R 3	28.66	28.41	29.04	29.04	28.41	28.7033	29.2822	0.317228	32.11	24.61	25.48	32.11	24.61	27.4	28.5756	4.10211	1.30333	0.706667	4.11436	4.47948	0.0144621	9.54444	746.731	33.4739	16657.9	713.257	15911.2
	Biological .R 1	29.71	30.28	29.07	30.28	29.07	29.6867		0.605337	36.25	26.54	28.86	36.25	26.54	30.55		5.07081	-0.863333		5.10681
	Biological .R 2	29.93	29.47	30.59	30.59	29.47	29.9967		0.562968	32.19	26.91	24.23	32.19	24.23	27.7767		4.05015	2.22		4.08909
DEF	Biological .R 3	31.54	29.78	31.15	31.54	29.78	30.8233	30.1689	0.924356	32.11	24.61	25.48	32.11	24.61	27.4	28.5756	4.10211	3.42333	1.59333	4.20497	4.46696	0.0129981	8.84222	458.959	20.7533	10149.9	438.206	9690.95
	Biological .R 1	20.74	19.14	20.27	20.74	19.14	20.05		0.822375	34.25	35.51	36.37	36.37	34.25	35.3767		1.06627	-15.3267		1.34656
	Biological .R 2	20.68	21.525	20.42	21.525	20.42	20.875		0.577733	36.28	35.52	36.04	36.28	35.52	35.9467		0.388501	-15.0717		0.69621
ABAH1	Biological .R 3	19.26	20.05	19.06	20.05	19.06	19.4567	20.1272	0.523482	35.49	34.53	36.25	36.25	34.53	35.4233	35.5822	0.861936	-15.9667	-15.455	1.00845	1.01707	0.000172649	32.2711	5.18298e+09	2.561e+09	1.04894e+10	2.62198e+09	5.30638e+09
	Biological .R 1	28.54	38.29	38.88	38.88	28.54	35.2367		5.80698	36.25	26.54	28.86	36.25	26.54	30.55		5.07081	4.68667		7.70935
	Biological .R 2	27.78	29.54	19.11	29.54	19.11	25.4767		5.58348	32.19	26.91	24.23	32.19	24.23	27.7767		4.05015	-2.3		6.89775
SCL21	Biological .R 3	24.77	20.95	27.61	27.61	20.95	24.4433	28.3856	3.342	32.11	24.61	25.48	32.11	24.61	27.4	28.5756	4.10211	-2.95667	-0.19	5.29115	6.63275	0.0184375	12.9744	8048.17	81.1036	798645	7967.06	790597
	Biological .R 1	27.74	28.41	27.77	28.41	27.74	27.9733		0.378462	34.25	35.51	36.37	36.37	34.25	35.3767		1.06627	-7.40333		1.13144
	Biological .R 2	23.75	23.81	24.05	24.05	23.75	23.87		0.158745	36.28	35.52	36.04	36.28	35.52	35.9467		0.388501	-12.0767		0.419682
PE2	Biological .R 3	20.85	19.14	20.74	20.85	19.14	20.2433	24.0289	0.957096	35.49	34.53	36.25	36.25	34.53	35.4233	35.5822	0.861936	-15.18	-11.5533	1.28801	0.946379	0.0051471	24.3378	2.12032e+07	1.1003e+07	4.08592e+07	1.02001e+07	1.9656e+07
	Biological .R 1	23.55	24.22	32.27	32.27	23.55	26.68		4.85266	34.25	35.51	36.37	36.37	34.25	35.3767		1.06627	-8.69667		4.96842
	Biological .R 2	20.09	23.54	20.02	23.54	20.02	21.2167		2.01237	36.28	35.52	36.04	36.28	35.52	35.9467		0.388501	-14.73		2.04953
AMY	Biological .R 3	23.99	23.34	22.4	23.99	22.4	23.2433	23.7133	0.799396	35.49	34.53	36.25	36.25	34.53	35.4233	35.5822	0.861936	-12.18	-11.8689	1.17557	2.73117	0.00220835	24.6533	2.63872e+07	3.974e+06	1.7521e+08	2.24132e+07	1.48823e+08
	Biological .R 1	20.98	20.57	21.12	21.12	20.57	20.89		0.285832	36.25	26.54	28.86	36.25	26.54	30.55		5.07081	-9.66		5.07886
	Biological .R 2	26.79	35.38	29.37	35.38	26.79	30.5133		4.40766	32.19	26.91	24.23	32.19	24.23	27.7767		4.05015	2.73667		5.98591
STP13	Biological .R 3	26.01	25.67	25.39	26.01	25.39	25.69	25.6978	0.310483	32.11	24.61	25.48	32.11	24.61	27.4	28.5756	4.10211	-1.71	-2.87778	4.11384	5.05954	0.0663395	15.6622	51856	1554.98	1.7293e+06	50301	1.67745e+06
	Biological .R 1	23.74	22.14	21.27	23.74	21.27	22.3833		1.25285	34.25	35.51	36.37	36.37	34.25	35.3767		1.06627	-12.9933		1.64516
	Biological .R 2	25.25	23.905	24.72	25.25	23.905	24.625		0.677514	36.28	35.52	36.04	36.28	35.52	35.9467		0.388501	-11.3217		0.780998
SWEET	Biological .R 3	22.08	22.95	21.06	22.95	21.06	22.03	23.0128	0.945992	35.49	34.53	36.25	36.25	34.53	35.4233	35.5822	0.861936	-13.3933	-12.5694	1.27978	1.23531	0.00094294	25.3539	4.28826e+07	1.82144e+07	1.0096e+08	2.46682e+07	5.8077e+07
	Biological .R 1	20.71	21.66	20.83	21.66	20.71	21.0667		0.517333	36.25	26.54	28.86	36.25	26.54	30.55		5.07081	-9.48333		5.09713
	Biological .R 2	26.88	21.71	19.65	26.88	19.65	22.7467		3.72481	32.19	26.91	24.23	32.19	24.23	27.7767		4.05015	-5.03		5.50254
PATATIN	Biological .R 3	35.91	31.7	34.99	35.91	31.7	34.2	26.0044	2.21339	32.11	24.61	25.48	32.11	24.61	27.4	28.5756	4.10211	6.8	-2.57111	4.66116	5.08694	0.0633663	15.3556	41925.9	1233.56	1.42497e+06	40692.4	1.38304e+06

## Sheet: Sheet3
Treatments/ Genes	Biological Replica	Technical. R 1	Technical. R 2	Technical. R 3	Target Max	Target Min	Ave each replica	Cp Target average	SD of Cp	Technical. R 1	Technical. R 2	Technical. R 3	Ref Max	Ref Min	Ave each replica	Cp Ref-average	SD of reference Cp	ΔCP Gene-Ref-each Rep	ΔCP Gene-Reference	ΔCP St dev	Ave-ΔCP St dev	T-Test (Tail 1-Type 2)	ΔΔCP	2^(-ΔΔCP) a.k.a fold change	Min 2^(-ΔΔCP)	Max 2^(-ΔΔCp)	2^(-ΔΔCp)- Min 2^(-ΔΔCp)	Max 2^(-ΔΔCP)- 2^(-ΔΔCP)
Control-168hpi
	Biological .R 1	26.07	27.38	26.11	27.38	26.07	26.52		0.74505	28.25	20.74	23.86	28.25	20.74	24.2833		3.77285	2.23667		3.84572
	Biological .R 2	24.22	27.96	28.11	28.11	24.22	26.7633		2.20387	27.69	21.79	22.9	27.69	21.79	24.1267		3.13545	2.63667		3.8325
LOX3	Biological .R 3	28.44	24.56	24.61	28.44	24.56	25.87	26.3844	2.22583	27.51	23.84	22.55	27.51	22.55	24.6333	24.3478	2.57341	1.23667	2.03667	3.40246	3.69356		0	1	0.0772908	12.9381	0.922709	11.9381
	Biological .R 1	34.77	34.58	36.95	36.95	34.58	35.4333		1.3169	28.25	20.74	23.86	28.25	20.74	24.2833		3.77285	11.15		3.99608
	Biological .R 2	35.52	33.24	36.14	36.14	33.24	34.9667		1.52713	27.69	21.79	22.9	27.69	21.79	24.1267		3.13545	10.84		3.48757
MYC2	Biological .R 3	33.49	32.61	34.09	34.09	32.61	33.3967	34.5989	0.744401	27.51	23.84	22.55	27.51	22.55	24.6333	24.3478	2.57341	8.76333	10.2511	2.67891	3.38752		0	1	0.0955552	10.4652	0.904445	9.46516
	Biological .R 1	32.47	34.93	35.18	35.18	32.47	34.1933		1.49768	28.25	20.74	23.86	28.25	20.74	24.2833		3.77285	9.91		4.05924
	Biological .R 2	36.61	36.84	34.87	36.84	34.87	36.1067		1.07714	27.69	21.79	22.9	27.69	21.79	24.1267		3.13545	11.98		3.31531
DEF	Biological .R 3	35.41	32.78	33.96	35.41	32.78	34.05	34.7833	1.31731	27.51	23.84	22.55	27.51	22.55	24.6333	24.3478	2.57341	9.41667	10.4356	2.89097	3.42184		0	1	0.0933088	10.7171	0.906691	9.7171
	Biological .R 1	35.11	37.49	36.47	37.49	35.11	36.3567		1.19404	20.33	21.41	19.3248	21.41	19.3248	20.3549		1.04282	16.0017		1.58531
	Biological .R 2	38.18	39.09	38.39	39.09	38.18	38.5533		0.47648	19.81	20.77	20.14	20.77	19.81	20.24		0.48775	18.3133		0.68186
ABAH1	Biological .R 3	36.09	37.18	36.35	37.18	36.09	36.54	37.15	0.569298	20.35	20.62	20.25	20.62	20.25	20.4067	20.3339	0.191398	16.1333	16.8161	0.600611	0.955928		0	1	0.51551	1.93983	0.48449	0.939827
	Biological .R 1	36.77	36.74	37.11	37.11	36.74	36.8733		0.205508	28.25	20.74	23.86	28.25	20.74	24.2833		3.77285	12.59		3.77845
	Biological .R 2	38.54	36.64	38.77	38.77	36.64	37.9833		1.16903	27.69	21.79	22.9	27.69	21.79	24.1267		3.13545	13.8567		3.34629
SCL21	Biological .R 3	37.23	37.34	35.05	37.34	35.05	36.54	37.1322	1.29155	27.51	23.84	22.55	27.51	22.55	24.6333	24.3478	2.57341	11.9067	12.7844	2.87933	3.33469		0	1	0.0991194	10.0888	0.900881	9.08885
	Biological .R 1	32.61	30.49	32.47	32.61	30.49	31.8567		1.18564	20.33	21.41	19.3248	21.41	19.3248	20.3549		1.04282	11.5017		1.57899
	Biological .R 2	33.38	35.31	34.32	35.31	33.38	34.3367		0.965108	19.81	20.77	20.14	20.77	19.81	20.24		0.48775	14.0967		1.08136
PE2	Biological .R 3	30.65	31.23	32.45	32.45	30.65	31.4433	32.5456	0.918767	20.35	20.62	20.25	20.62	20.25	20.4067	20.3339	0.191398	11.0367	12.2117	0.938492	1.19961		0.572756	1.48736	0.647585	3.41614	0.839776	1.92878
	Biological .R 1	32.64	31.89	33.47	33.47	31.89	32.6667		0.790337	20.33	21.41	19.3248	21.41	19.3248	20.3549		1.04282	12.3117		1.30848
	Biological .R 2	32.38	31.91	31.32	32.38	31.32	31.87		0.531131	19.81	20.77	20.14	20.77	19.81	20.24		0.48775	11.63		0.72111
AMY	Biological .R 3	33.25	34.09	32.45	34.09	32.45	33.2633	32.6	0.820081	20.35	20.62	20.25	20.62	20.25	20.4067	20.3339	0.191398	12.8567	12.2661	0.84212	0.957236		0.518311	1.43228	0.737684	2.78089	0.694594	1.34861
	Biological .R 1	37.22	38.58	38.91	38.91	37.22	38.2367		0.895786	28.25	20.74	23.86	28.25	20.74	24.2833		3.77285	13.9533		3.87774
	Biological .R 2	31.24	30.65	31.37	31.37	30.65	31.0867		0.38371	27.69	21.79	22.9	27.69	21.79	24.1267		3.13545	6.96		3.15884
GLUB	Biological .R 3	36.67	35.69	37.07	37.07	35.69	36.4767	35.2667	0.710023	27.51	23.84	22.55	27.51	22.55	24.6333	24.3478	2.57341	11.8433	10.9189	2.66956	3.23538		1.86556	3.64408	0.386938	34.319	3.25714	30.6749
	Biological .R 1	35.61	37.49	37.47	37.49	35.61	36.8567		1.07969	20.33	21.41	19.3248	21.41	19.3248	20.3549		1.04282	16.5017		1.50107
	Biological .R 2	33.98	35.25	33.89	35.25	33.89	34.3733		0.760548	19.81	20.77	20.14	20.77	19.81	20.24		0.48775	14.1333		0.903512
SWEET	Biological .R 3	35.09	35.08	36.15	36.15	35.08	35.44	35.5567	0.614898	20.35	20.62	20.25	20.62	20.25	20.4067	20.3339	0.191398	15.0333	15.2228	0.643998	1.01619		-2.43836	0.184494	0.0912173	0.373153	0.0932766	0.188659
	Biological .R 1	36.07	36	35.74	36.07	35.74	35.9367		0.173877	28.25	20.74	23.86	28.25	20.74	24.2833		3.77285	11.6533		3.77686
	Biological .R 2	34.96	36.11	36.44	36.44	34.96	35.8367		0.776938	27.69	21.79	22.9	27.69	21.79	24.1267		3.13545	11.71		3.23027
PATATIN	Biological .R 3	33.9	35.26	34.71	35.26	33.9	34.6233	35.4656	0.68413	27.51	23.84	22.55	27.51	22.55	24.6333	24.3478	2.57341	9.99	11.1178	2.66279	3.22331		1.66667	3.1748	0.339941	29.6503	2.83486	26.4755
DS-168 hpi
	Biological .R 1	35.66	36.09	36.21	36.21	35.66	35.9867		0.289194	36.25	26.54	28.86	36.25	26.54	30.55		5.07081	5.43667		5.07905
	Biological .R 2	35.77	34.98	34.86	35.77	34.86	35.2033		0.494402	32.19	26.91	24.23	32.19	24.23	27.7767		4.05015	7.42667		4.08022
LOX3	Biological .R 3	33.76	34.52	35.79	35.79	33.76	34.69	35.2933	1.02562	32.11	24.61	25.48	32.11	24.61	27.4	28.5756	4.10211	7.29	6.71778	4.22838	4.46255	0.00180599	-4.68111	0.0389803	0.00176801	0.859421	0.0372123	0.820441
	Biological .R 1	28.81	28.69	29.13	29.13	28.69	28.8767		0.22745	36.25	26.54	28.86	36.25	26.54	30.55		5.07081	-1.67333		5.07591
	Biological .R 2	29.23	29.87	31.7	31.7	29.23	30.2667		1.28189	32.19	26.91	24.23	32.19	24.23	27.7767		4.05015	2.49		4.24817
MYC2	Biological .R 3	28.66	28.41	29.04	29.04	28.41	28.7033	29.2822	0.317228	32.11	24.61	25.48	32.11	24.61	27.4	28.5756	4.10211	1.30333	0.706667	4.11436	4.47948	0.0144621	9.54444	746.731	33.4739	16657.9	713.257	15911.2
	Biological .R 1	29.71	30.28	29.07	30.28	29.07	29.6867		0.605337	36.25	26.54	28.86	36.25	26.54	30.55		5.07081	-0.863333		5.10681
	Biological .R 2	29.93	29.47	30.59	30.59	29.47	29.9967		0.562968	32.19	26.91	24.23	32.19	24.23	27.7767		4.05015	2.22		4.08909
DEF	Biological .R 3	31.54	29.78	31.15	31.54	29.78	30.8233	30.1689	0.924356	32.11	24.61	25.48	32.11	24.61	27.4	28.5756	4.10211	3.42333	1.59333	4.20497	4.46696	0.0129981	8.84222	458.959	20.7533	10149.9	438.206	9690.95
	Biological .R 1	20.74	19.14	20.27	20.74	19.14	20.05		0.822375	34.25	35.51	36.37	36.37	34.25	35.3767		1.06627	-15.3267		1.34656
	Biological .R 2	20.68	21.525	20.42	21.525	20.42	20.875		0.577733	36.28	35.52	36.04	36.28	35.52	35.9467		0.388501	-15.0717		0.69621
ABAH1	Biological .R 3	19.26	20.05	19.06	20.05	19.06	19.4567	20.1272	0.523482	35.49	34.53	36.25	36.25	34.53	35.4233	35.5822	0.861936	-15.9667	-15.455	1.00845	1.01707	0.000172649	32.2711	5.18298e+09	2.561e+09	1.04894e+10	2.62198e+09	5.30638e+09
	Biological .R 1	28.54	38.29	38.88	38.88	28.54	35.2367		5.80698	36.25	26.54	28.86	36.25	26.54	30.55		5.07081	4.68667		7.70935
	Biological .R 2	27.78	29.54	19.11	29.54	19.11	25.4767		5.58348	32.19	26.91	24.23	32.19	24.23	27.7767		4.05015	-2.3		6.89775
SCL21	Biological .R 3	24.77	20.95	27.61	27.61	20.95	24.4433	28.3856	3.342	32.11	24.61	25.48	32.11	24.61	27.4	28.5756	4.10211	-2.95667	-0.19	5.29115	6.63275	0.0184375	12.9744	8048.17	81.1036	798645	7967.06	790597
	Biological .R 1	27.74	28.41	27.77	28.41	27.74	27.9733		0.378462	34.25	35.51	36.37	36.37	34.25	35.3767		1.06627	-7.40333		1.13144
	Biological .R 2	23.75	23.81	24.05	24.05	23.75	23.87		0.158745	36.28	35.52	36.04	36.28	35.52	35.9467		0.388501	-12.0767		0.419682
PE2	Biological .R 3	20.85	19.14	20.74	20.85	19.14	20.2433	24.0289	0.957096	35.49	34.53	36.25	36.25	34.53	35.4233	35.5822	0.861936	-15.18	-11.5533	1.28801	0.946379	0.0051471	24.3378	2.12032e+07	1.1003e+07	4.08592e+07	1.02001e+07	1.9656e+07
	Biological .R 1	23.55	24.22	32.27	32.27	23.55	26.68		4.85266	34.25	35.51	36.37	36.37	34.25	35.3767		1.06627	-8.69667		4.96842
	Biological .R 2	20.09	23.54	20.02	23.54	20.02	21.2167		2.01237	36.28	35.52	36.04	36.28	35.52	35.9467		0.388501	-14.73		2.04953
AMY	Biological .R 3	23.99	23.34	22.4	23.99	22.4	23.2433	23.7133	0.799396	35.49	34.53	36.25	36.25	34.53	35.4233	35.5822	0.861936	-12.18	-11.8689	1.17557	2.73117	0.00220835	24.6533	2.63872e+07	3.974e+06	1.7521e+08	2.24132e+07	1.48823e+08
	Biological .R 1	20.98	20.57	21.12	21.12	20.57	20.89		0.285832	36.25	26.54	28.86	36.25	26.54	30.55		5.07081	-9.66		5.07886
	Biological .R 2	26.79	35.38	29.37	35.38	26.79	30.5133		4.40766	32.19	26.91	24.23	32.19	24.23	27.7767		4.05015	2.73667		5.98591
GLUB	Biological .R 3	26.01	25.67	25.39	26.01	25.39	25.69	25.6978	0.310483	32.11	24.61	25.48	32.11	24.61	27.4	28.5756	4.10211	-1.71	-2.87778	4.11384	5.05954	0.0663395	15.6622	51856	1554.98	1.7293e+06	50301	1.67745e+06
	Biological .R 1	23.74	22.14	21.27	23.74	21.27	22.3833		1.25285	34.25	35.51	36.37	36.37	34.25	35.3767		1.06627	-12.9933		1.64516
	Biological .R 2	25.25	23.905	24.72	25.25	23.905	24.625		0.677514	36.28	35.52	36.04	36.28	35.52	35.9467		0.388501	-11.3217		0.780998
SWEET	Biological .R 3	22.08	22.95	21.06	22.95	21.06	22.03	23.0128	0.945992	35.49	34.53	36.25	36.25	34.53	35.4233	35.5822	0.861936	-13.3933	-12.5694	1.27978	1.23531	0.00094294	25.3539	4.28826e+07	1.82144e+07	1.0096e+08	2.46682e+07	5.8077e+07
	Biological .R 1	20.71	21.66	20.83	21.66	20.71	21.0667		0.517333	36.25	26.54	28.86	36.25	26.54	30.55		5.07081	-9.48333		5.09713
	Biological .R 2	26.88	21.71	19.65	26.88	19.65	22.7467		3.72481	32.19	26.91	24.23	32.19	24.23	27.7767		4.05015	-5.03		5.50254
PATATIN	Biological .R 3	35.91	31.7	34.99	35.91	31.7	34.2	26.0044	2.21339	32.11	24.61	25.48	32.11	24.61	27.4	28.5756	4.10211	6.8	-2.57111	4.66116	5.08694	0.0633663	15.3556	41925.9	1233.56	1.42497e+06	40692.4	1.38304e+06
